# Supplementary material
Source: PubMed Central journal article supplement (PMC1150814)

# A. Alpha 1 Domain

```

ChCD1-2 : -ETSCPPPEESQFFQLFVTELLGN-VSSTELTGVALLAQVPIMVLDPHTWNLNLCR--PWVQEITAETEVEKKLISFSMVGIRNTIRFHEMTAKAGLD-- : 94
chCD1-1 : -----PEGSHMLKLLHFATFQN-STSVLVGGLCLLGGVVKMGSLDSRTGNIRYYR--PWLRPPLPKGDVDVIESSIKS----YVRDFSRLVQMYTTVP- : 85
huCD1a : -GN-ADGLKEPLSFHVITIASFYN-HSWKQLVSGWLSLQIHTWDSNSSTIVFLW--PWSRGNFSNEBQKLETLFRIRTIKRSFEGIRRYAHELQFE-- : 93
huCD1b : -GNSEHAFQGPSTSFHVITQSSFTN-STWAQTOGSGWLDLQIHWDSDSGTALFLK--PWSKGNFSDKVEAELEELFRVYIFGFAREVQDFAGDFQMK-- : 94
muCD1d1.1 : WGQ-SEAQQKNYIFRCLQMSFFAN-RSWSRTDSVWVWGLQIHTWDSNSATISFTK--PWSQGLKLSNQQWELQOHMFQVYRVSFTRDQLQELVKMMSPKED : 96
chBF2*12 : -AAVCGAAELHLLRYIQAMTDPGPGQPWFVTGVVYDGEVLFVHYNSTAR--RYVPRTEVIAAKADQOYVDGQTIQGGNEQIDRENGLIQRRYINQTG- : 96
HLA-A2 : -LALTQTWAGSHSMRYFFTSVSRPGRGEPFRFIAVGVYVDLQFVRFDSDAASQRMPEPRAFWIEQEG-PEYVDGETRKYKAHSQTHRVDLGTLRGYYNQSEA : 98
H2Kd : -LAPTQTRAGPHSLRYFVTAVSRPGLGEPFRFIAVGVYVDLQFVRFDSADNPRFEPRAFWMBQEG-PEYVDEEQTQRAKSDEQWFRVSLRRTAQRYYNQSKG : 98
  
```

|           | chCD1-2    | chCD1-1    | huCD1a     | huCD1b     | muCD1d1.1  | chBF2*12   | HLA-A2     | H2Kd       |
|-----------|------------|------------|------------|------------|------------|------------|------------|------------|
| chCD1-2   | 100%<br>0% |            |            |            |            |            |            |            |
| chCD1-1   | 22%<br>40% | 100%<br>0% |            |            |            |            |            |            |
| huCD1a    | 11%<br>36% | 15%<br>35% | 100%<br>0% |            |            |            |            |            |
| huCD1b    | 17%<br>36% | 16%<br>41% | 45%<br>63% | 100%<br>0% |            |            |            |            |
| muCD1d1.1 | 12%<br>34% | 16%<br>41% | 30%<br>57% | 37%<br>56% | 100%<br>0% |            |            |            |
| chBF2*12  | 4%<br>19%  | 12%<br>24% | 8%<br>22%  | 9%<br>25%  | 11%<br>31% | 100%<br>0% |            |            |
| HLA-A2    | 7%<br>24%  | 16%<br>31% | 10%<br>24% | 14%<br>30% | 16%<br>38% | 38%<br>57% | 100%<br>0% |            |
| H2Kd      | 7%<br>25%  | 16%<br>29% | 15%<br>26% | 16%<br>31% | 13%<br>38% | 40%<br>56% | 69%<br>80% | 100%<br>0% |

|                     |
|---------------------|
| <u>% Identity</u>   |
| <u>% Similarity</u> |

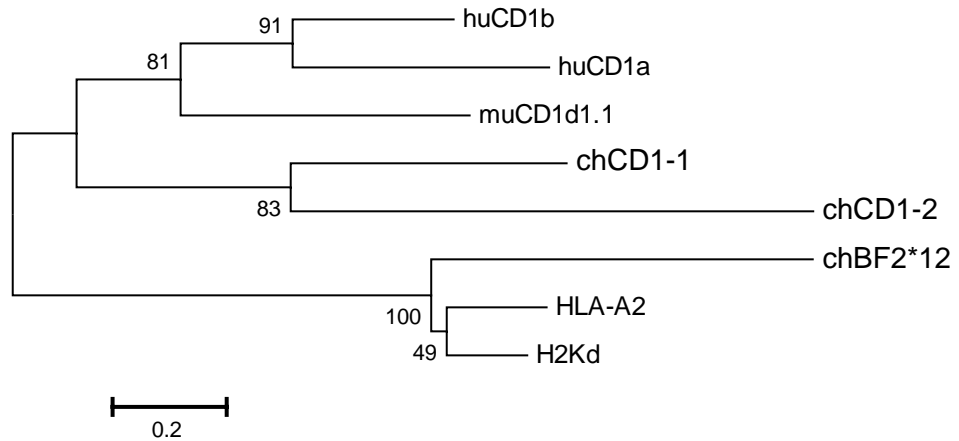

## B. Alpha 2 Domain

```

ChCD1-2 : YPRVFCIHTGCKL-YTNGTRWSFVNIIGEGCRLLVYVELSRERVPQRST-LLAKVMSNTLTDLRAVSGFLEHIFSSFPNMTLMLHEGRTDLERR : 94
chCD1-1 : YPFVFCSSIGCCL-QSNGTIRTFFDIAYEGONFIRENLDAQTIDQMQRN-QLSAKAHLMANASTLNEVLIQVLLNDTCVDILRLFTQAGKADLER- : 93
huCD1a : YPFETQVTGGCEL-HSGKVSQSFLQLAYCGSDFVSFQNN--LPLYPVAGNMAKHFCKVLNQNHENDITHNLSDFCPRETLGLLDAGKAHLORQ : 93
huCD1b : YPFETQGIACCEL-HSGGATVSLRGLGCLDFLSVKNAS--CVPSPEGGSRAOKFCALIIQYQGIMETVRILLYEFCPRVLLGVLNAGKADLORQ : 93
muCD1d1.1 : YPIETQLSAGCEM-YPGNASESFLHVAFCCKYVIRFWGTS--QTVPGAPSWLDDLPKVLNADQGTSAIVQMLNDTCPLFVVRGLLEAGKSDLKQ : 93
chBF2*12 : GSHTVQWMYGCDI-LEGGPIRGYQMAVDCRDFTAIDKGTMTTAAVPEAVPTKRKWE---EESPERWKNYLEETCVEWLRRLRYLYGKAELEGR : 91
HLA-A2 : GSHTVQRMYGCDVGSDFRFLRGLYHQYAVDGKDYIALKEDLRSTAAADMAAQTTKHKWE---AAHVAEQLRAYLEGTCEVWLRRLRYLYGKAELEGR : 92
H2Kd : GSHTFRMFGCDVGSDFRLLRGLYHQYAVDGRDYIALNEDLKTAAADTAALITRRKWE---QAGDAEYRYAYLEGECEVWLRRLRYLYGKAELEGR : 92
  
```

|           | chCD1-2    | chCD1-1    | huCD1a     | huCD1b     | muCD1d1.1  | chBF2*12   | HLA-A2     | H2Kd       |
|-----------|------------|------------|------------|------------|------------|------------|------------|------------|
| chCD1-2   | 100%<br>0% |            |            |            |            |            |            |            |
| chCD1-1   | 23%<br>53% | 100%<br>0% |            |            |            |            |            |            |
| huCD1a    | 25%<br>50% | 29%<br>52% | 100%<br>0% |            |            |            |            |            |
| huCD1b    | 23%<br>46% | 32%<br>47% | 51%<br>66% | 100%<br>0% |            |            |            |            |
| muCD1d1.1 | 21%<br>46% | 28%<br>50% | 45%<br>63% | 38%<br>54% | 100%<br>0% |            |            |            |
| chBF2*12  | 13%<br>31% | 25%<br>46% | 23%<br>41% | 22%<br>40% | 15%<br>38% | 100%<br>0% |            |            |
| HLA-A2    | 13%<br>26% | 22%<br>44% | 22%<br>40% | 19%<br>36% | 17%<br>34% | 52%<br>66% | 100%<br>0% |            |
| H2Kd      | 13%<br>26% | 21%<br>41% | 16%<br>36% | 16%<br>31% | 15%<br>30% | 50%<br>68% | 76%<br>83% | 100%<br>0% |

|                     |
|---------------------|
| <u>% Identity</u>   |
| <u>% Similarity</u> |

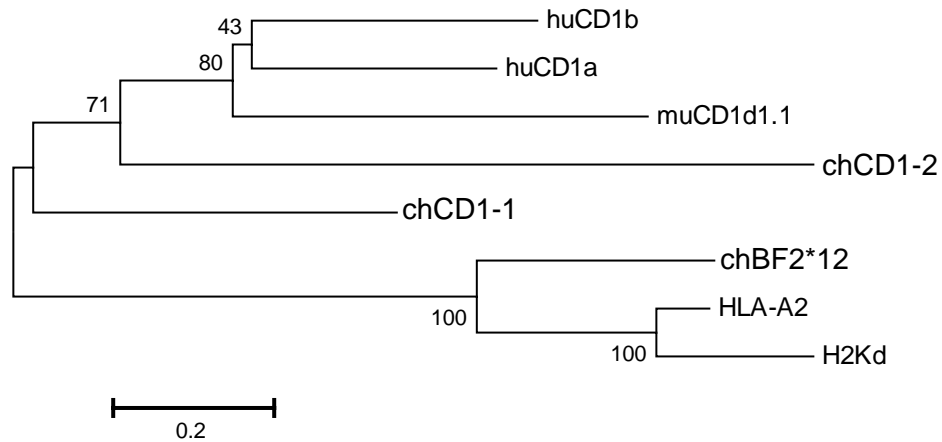

### C. Alpha 3 Domain

```

ChCD1-2 : -VPPMAVVFARTAGVQVLLVCRVTSFYPRPIAVVWLRDGREVPPSPALSTCVLPNADLTYQLRSLLWSPQDGHGYACRVCHCSLGDRSLLVLPW : 95
chCD1-1 : -QPPMAVVFARTAGQAQLLVCRVTSFYPRPIAVVWLRDGREVPPSPALSTCVLPNADLTYQLRSLLWSPQDGHGYACRVCHCSLGDRSLLVLPW : 95
huCD1a : VKPEAWLSHGPPSPGPGHQLVCHVSGFYPKPVWVWMMRGEOEQQGT---QRDILPSADCTWYLRATLEWAAEAAADLSCRVRHSSLEGQDITVLYW : 93
huCD1b : VKPEAWLSSGPPSPGPGHQLVCHVSGFYPKPVWVWMMRGEOEQQGT---QLDILPNAWNTWYLRATLDVADAEAAAGLSCRVRHSSLEGQDITVLYW : 93
muCD1d1.1 : EKPVAVLSSVPSAHGHRQLVCHVSGFYPKPVWVWMMRGDQEQQGT---HRDFLPNADCTWYLRATLDVVEAEAEAGLSCRVRHSSLEGQDITVLYW : 93
chBF2*12 : ERPEVRVW-GKEA-DGIITLSCRAHGFYPRPIVVSWLKDGAVRGQD--AHSGLVINGDGTVHTWVITDAQPCDGDKYQCRVBEASTP-QPGYYSW : 91
HLA-A2 : DAPKTHMTHHAVS-DHEATLRQWALSFYPAEITLWQRDGEDQTQD--TELVETRPAGDGTQKWAAVVWPSQEQRYTCHVQHEGLP-KPTITRW : 92
H2Kd : DSEKAHVITYHPRS-QVDVTLRQWALGFYBADITLWQLNGEDLTQD--MELVETRPAGDGTQKWAAVVWPLQEQNYTCHVQHEGLP-EPTITRW : 92
  
```

|           | chCD1-2    | chCD1-1    | huCD1a     | huCD1b     | muCD1d1.1  | chBF2*12   | HLA-A2     | H2Kd       |
|-----------|------------|------------|------------|------------|------------|------------|------------|------------|
| chCD1-2   | 100%<br>0% |            |            |            |            |            |            |            |
| chCD1-1   | 97%<br>97% | 100%<br>0% |            |            |            |            |            |            |
| huCD1a    | 34%<br>56% | 34%<br>57% | 100%<br>0% |            |            |            |            |            |
| huCD1b    | 35%<br>57% | 35%<br>58% | 89%<br>93% | 100%<br>0% |            |            |            |            |
| muCD1d1.1 | 35%<br>56% | 35%<br>57% | 77%<br>84% | 78%<br>83% | 100%<br>0% |            |            |            |
| chBF2*12  | 38%<br>51% | 38%<br>52% | 31%<br>51% | 31%<br>50% | 30%<br>48% | 100%<br>0% |            |            |
| HLA-A2    | 27%<br>39% | 27%<br>39% | 24%<br>43% | 22%<br>40% | 24%<br>40% | 32%<br>47% | 100%<br>0% |            |
| H2Kd      | 26%<br>41% | 25%<br>40% | 24%<br>44% | 23%<br>41% | 25%<br>40% | 32%<br>45% | 76%<br>86% | 100%<br>0% |

|                     |
|---------------------|
| <b>% Identity</b>   |
| <b>% Similarity</b> |

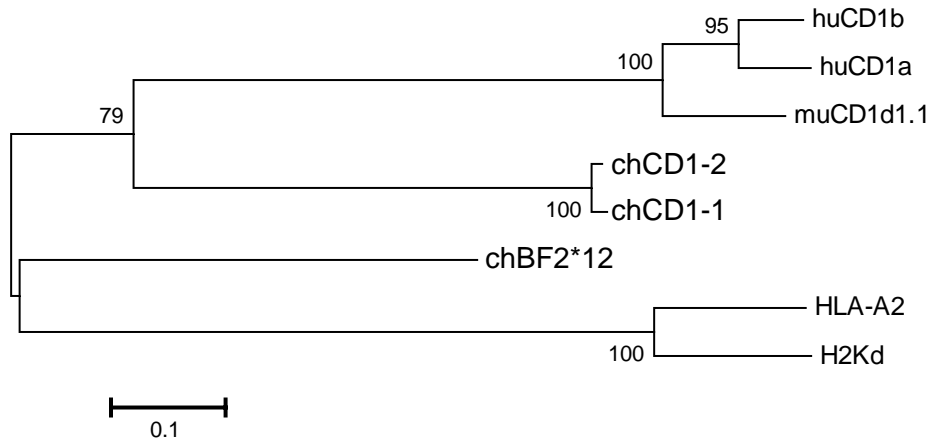

## D. Alpha 1 and 2 Domains (Antigen Binding Pocket)

```

ChCD1-2 : -ETSCPPPEESQFFOLFYLLELGN-VSSTELTGVALLAVPIMVLDPHTW--NLNICRPPWQEITAETEVKKL LSFMSVGRINTIRFMHEMTAKAGLD--
chCD1-1 : -----PEGSHMLKLLHFATFQN-STSVLVGGLCLLGVKMGSLDSRTG--NIRYYRPPWRPSPKGDVDVLESSIKSYVRDFSRIVQMYT-----TVP
huCD1a : -GN-ADGLKEPLSFHVITWIASFYN-HSWKQNLVSGWLSLDTHTWDSNNS--TIVFLWPWSRGNFSNEBQKLETLFRIRTI RSFEGIRRYAHELQFE--
huCD1b : -GNSEHAFQGPSTSFHVITWIASFYN-STWAQTOGSGWLDLQIHLGWDSDSG--TAIFLKPWSKGNFSDKVEAELEEIFRVYIFGFAREVQDFAGDFQMK--
muCD1d1.1 : WGQ-SEAQQKNYIFRCLQSSSFAN-RSWSRTDSVWVWGLDQTHRWSDNSA--TISFTKPPWSQGLSNQVQEKLOHMFQVYRVSFTRDIQELVKMMSPKED
chBF2*12 : -AAVCGAAAELHLRLRYIQTAMTDPGPGQPWFVTVGVVDGELFVHYNSTAR--RYVPRTEWLAAKADQOYDGGQTOICGQNEQIDRENGLILQRRYNTQ-G
HLA-A2 : -LALTQTWAGSHSMRYFFTSVSRPGRGEPRFIAVGVVDLDTQFVRFDSDAASQRMPEPRAPIWIEQEG-PEYDGETRKRKVAHSQTHRVDLGLTRGYYNQSEA
H2Kd : -LAPTQTRAGPHSLRYFVITAVSRPGLGEPRFIAVGVVDLDTQFVRFDSADNPRFEPRAPIWMBQEG-PEYDDEQTQRAKSDEQWFRVSLRRTAQRYYNQSKG
  
```

```

ChCD1-2 : YPRVFCIHTCCKLYING-TRWSFVNI GEGCRDLVTVELSRERWVQORSTLLAKVMSNTLTDLRAVSGFLEHIFSSFPNMI LMLHEBCFTDLERR
chCD1-1 : YPFVFCSSIGCBLQING-TTRTFDIAVEGONFLRFENLDAGTWDQMOHNLQSAKAHLMANASTLNVEIQVLENDTCVDLRLFTQAGKADLER-
huCD1a : YPFETQVTGGCBLHSGK-VSGSFLOLAWQCSDFVSNNSWLPYPVAGNMAKHFCVVLNQNQHEN-DITHNLSDTCPRFSLGLDAGRAHLORQ
huCD1b : YPFETQGIACBLHSGG-AIVSFLRGALGGLDFLSVKNASCVSPSEGGSSRAQKFCALIIQYQGIM-ETVRIILLYETCPRLVLLGVNAGKADLORQ
muCD1d1.1 : YPIETQLSAGCBMYPGN-ASESFLHVAFCCKYVRFVWGTSWQTVPGAPSWLDDLPIKVLNADQGTS-ATVQMLNDTCPLFVRGLLEACKSDLKQ
chBF2*12 : GSHTVQWMMYCDILEGG-PIRGYYQMYDGRDFTAFDKG--TMTFTAAVPEAVPTKRKWEESSEP-ERWKNYLEETQVEVLRRYVLENGKAELEERR
HLA-A2 : GSHTVQRMVYCDILEGG-PIRGYYQMYDGRDFTAFDKG--LRSWTAADMAAQTTRKHWEEAHHVA-EQLRAYLEGTQVEVLRRYVLENGKAELEERR
H2Kd : GSHTVQRMVYCDILEGG-PIRGYYQMYDGRDFTAFDKG--LKTWTAADTAALITRKRKWEQAGDA-EYFRAYLEGTQVEVLRRYVLENGKAELEERR
  
```

|           | chCD1-2    | chCD1-1    | huCD1a     | huCD1b     | muCD1d1.1  | chBF2*12   | HLA-A2     | H2Kd       |
|-----------|------------|------------|------------|------------|------------|------------|------------|------------|
| chCD1-2   | 100%<br>0% |            |            |            |            |            |            |            |
| chCD1-1   | 23%<br>48% | 100%<br>0% |            |            |            |            |            |            |
| huCD1a    | 16%<br>40% | 23%<br>43% | 100%<br>0% |            |            |            |            |            |
| huCD1b    | 19%<br>41% | 25%<br>45% | 48%<br>65% | 100%<br>0% |            |            |            |            |
| muCD1d1.1 | 17%<br>41% | 23%<br>46% | 37%<br>60% | 37%<br>55% | 100%<br>0% |            |            |            |
| chBF2*12  | 8%<br>25%  | 17%<br>33% | 16%<br>31% | 15%<br>31% | 15%<br>35% | 100%<br>0% |            |            |
| HLA-A2    | 9%<br>26%  | 17%<br>37% | 17%<br>33% | 18%<br>35% | 17%<br>36% | 45%<br>61% | 100%<br>0% |            |
| H2Kd      | 9%<br>24%  | 18%<br>34% | 16%<br>31% | 17%<br>32% | 13%<br>34% | 45%<br>62% | 72%<br>82% | 100%<br>0% |

|              |
|--------------|
| % Identity   |
| % Similarity |

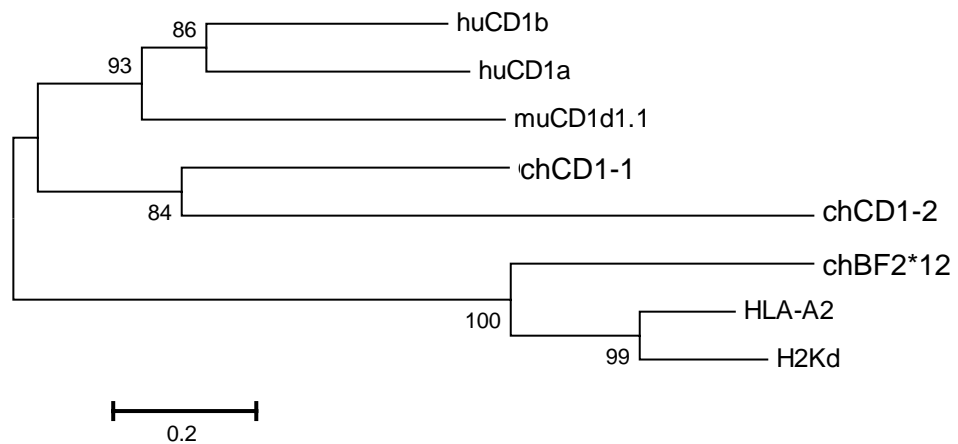

## E. Alpha 1, 2, and 3 Domains

```

GagaCD1.1 : --ETSCPPPEESQFFOLFVYTLNLLGN-VSSTELTGVALLADVPIMVLPHTWNLNICR--EIVQEIETAETEVEKLLSFSMVGIRNTRFMMHMTAKAGLD-- : 94
chCD1-1 : -----PEGSHMLKLLHFATFQN-STSVLVGGLGLLGVKMGSLDSRTGNIRVYR--EPLRPSLPKGDVDVLESSIKSYVRDFSRIVQMYTTVP----- : 85
huCD1a : --GN-ADGLKEPLSFHVIVIASFYFN-HSWKQNLVSGWLSLQHTHTWDSNSSTIVELW--EWSRGNFNSNEEIKLETLEFRIRTIRESFECIRRYAHELQFEE-- : 93
huCD1b : --GNSEHAFQGGPFSFHVIVQESSFTN-STWAQTQGSGLDLDLQIHGWSDSDSGTATFLK--EWSKGNFSDKEVAELLEEIRVYVIFGFAREVQDFAGDFQMK-- : 94
muCD1d1.1 : WGQ-SEAQKKNYIFRCLQMSFFAN-RSWRSTDSVVLGLDLOTHRWSNDSATISFTK--EWSQGLKLSNQQEKLQHMVFQVYRVSFTRDIQELVKMMSPKED : 96
chBF2*12 : --AAVCGAAAELHILRYIQTAMTDPGPGQWVFTVGVVDGELFVHYNSTAR--RYVPRTEWIAAKADQOYVDGQTQIQGGNEQIDREMLGILQRRYNTQ-TG : 96
HLA-A2 : --LALTQTWAGSHSMRYFFTSVSRPGRGEPFRFIAVGVVDLQFVRFSDAASQRMEPRAPWIEQEG-PEYVDGETRQVKAHQSQTHRVDTGLTRGYNQSEA : 98
H2Kd : --LAPTQTRAGPHSLRYFVAVSRPGLGEPFRFIAVGVVDLQFVRFSDADNPRPEPRAPWIEQEG-PEYVDGETQRAKSDEQWFRVSLRTAQRYYNQSKG : 98

```

```

GagaCD1.1 : YPRVFCIHTGCKLYLNG-TRWSFVNIIGEGRDLVTVYELSRERWVPRQSTLLAKVMSNTLTDLRAVSGFLEHIFSSFPFNILMLHEGRTDLEHRRVPEMA : 193
chCD1-1 : YPFVRCSSIGCBLOQNG-TIRTFFDIAVEGQNEIRENLDAQTWDQMHNLQSAKAEHLMANASTLNEVIQVLENDTQVDLRLFIQAGKADLER-QEPMA : 183
huCD1a : YPFETQVTGGCELHSGK-VSGSFLQIAYQGSDFVSEFNNSWLPYYPV-AGNMAKHFCVKVNLQNHENDITHNLSDTQPRFLLGLLDAGKAHLQROVKPEA : 191
huCD1b : YPFETQGIACCELHSGG-ATVSEFLRCALGGLDFLSVKNASCVPSP-EWSSRAQKFCALIIQYQIGIMETVRILLYETQPRVLLGLVFNAGKADLQROVKPEA : 192
muCD1d1.1 : YPIETQLSAGCEBMYPGN-ASESFLHVAFCCKYVIRFWGTSWQTVPG-APSWLDLPIKVLNADQGTSAIVQMLNDTQPLFVRGLLEACKSDLEKQEKPEVA : 194
chBF2*12 : GSHTVQWMYGCDIILEGG-PIRGYQMAVDCRDFTAFDKGTMTFTAA---VPEAVPTKRKWESESEPERWKNYLEETQVBNLRRYVVEYKRAELGRRRREPEV : 192
HLA-A2 : GSHTVQRMVGCDDVGSDFWRFLRCYHQYAVDCKDYIALKEDLRSWTAA---DMAAQTTKHKWEAAHVAEQLRAYLEGTQVBNLRRYVVEYKRAELGRRRREPEV : 195
H2Kd : GSHTVQRMVGCDDVGSDFWRLLRCYHQYAVDGRDYIALNEDLKTWTAA---DTAALITRRKWEQAGDAEYRYRAYLEGEQVBNLRRYVVEYKRAELGRRRREPEV : 195

```

```

GagaCD1.1 : VVVFAR-TAGQVQLLVCRVTSFYPRPIAVTWLDRDGREVPPSPALSTGTVPINADLTYQLRSITLLVSPQDGHGVACRVQHCSSLGDRSLLVLPW : 283
chCD1-1 : VVVFAR-TAGQAQLLVCRVTSFYPRPIAVTWLDRDGREVPPSPALSTGTVPINADLTYQLRSITLLVSPQDGHGVACRVQHCSSLGDRSLLVLPW : 273
huCD1a : WLSHGSPSPGPHLQLVCHVSGFYPKFVWMMWRGEEQEQ---GTQRCDLIPNADGTYWYLRATIDVADGEAAGLSCRVKHSSLEGODLIIYVW : 279
huCD1b : WLSHGSPSPGPHLQLVCHVSGFYPKFVWMMWRGEEQEQ---GTQRCDLIPNANWYWYLRATIDVADGEAAGLSCRVKHSSLEGODLIIYVW : 280
muCD1d1.1 : WLSVSPSSAHGHRQLVCHVSGFYPKFVWMMWRGEEQEQ---GTHRCDFIPNADGTYWYLRATIDVADGEAAGLSCRVKHSSLEGODLIIYVW : 282
chBF2*12 : RW-WGKEADG-IITLSCRAGFYPRPIAVTWLDRDGREVPPSPALSTGTVPINADLTYQLRSITLLVSPQDGHGVACRVQHCSSLGDRSLLVLPW : 278
HLA-A2 : HMTTHAVSDH-EATRCWALSFYPAHITLITWQDGEDQT--QDTBELVETRPAGDGTQKWAAVVVPSCQEQRVYTCVQHEGLP-KPITLIRW : 282
H2Kd : HVTYHPRSQV-DVITRCWALGFYPAHITLITWQDGEDLT--QDMELVETRPAGDGTQKWAAVVVPSCQEQRVYTCVQHEGLP-KPITLIRW : 282

```

|           | chCD1-2 | chCD1-1 | huCD1a | huCD1b | muCD1d1.1 | chBF2*12 | HLA-A2 | H2Kd |
|-----------|---------|---------|--------|--------|-----------|----------|--------|------|
| chCD1-2   | 100%    |         |        |        |           |          |        |      |
|           | 0%      |         |        |        |           |          |        |      |
| chCD1-1   | 48%     | 100%    |        |        |           |          |        |      |
|           | 65%     | 0%      |        |        |           |          |        |      |
| huCD1a    | 24%     | 26%     | 100%   |        |           |          |        |      |
|           | 47%     | 48%     | 0%     |        |           |          |        |      |
| huCD1b    | 25%     | 30%     | 62%    | 100%   |           |          |        |      |
|           | 47%     | 50%     | 74%    | 0%     |           |          |        |      |
| muCD1d1.1 | 23%     | 26%     | 50%    | 51%    | 100%      |          |        |      |
|           | 47%     | 49%     | 68%    | 65%    | 0%        |          |        |      |
| chBF2*12  | 18%     | 25%     | 20%    | 20%    | 19%       | 100%     |        |      |
|           | 33%     | 38%     | 37%    | 37%    | 39%       | 0%       |        |      |
| HLA-A2    | 15%     | 21%     | 19%    | 19%    | 19%       | 40%      | 100%   |      |
|           | 32%     | 39%     | 36%    | 37%    | 37%       | 56%      | 0%     |      |
| H2Kd      | 15%     | 21%     | 18%    | 19%    | 17%       | 41%      | 73%    | 100% |
|           | 31%     | 37%     | 35%    | 35%    | 35%       | 56%      | 83%    | 0%   |

|                     |
|---------------------|
| <u>% Identity</u>   |
| <u>% Similarity</u> |

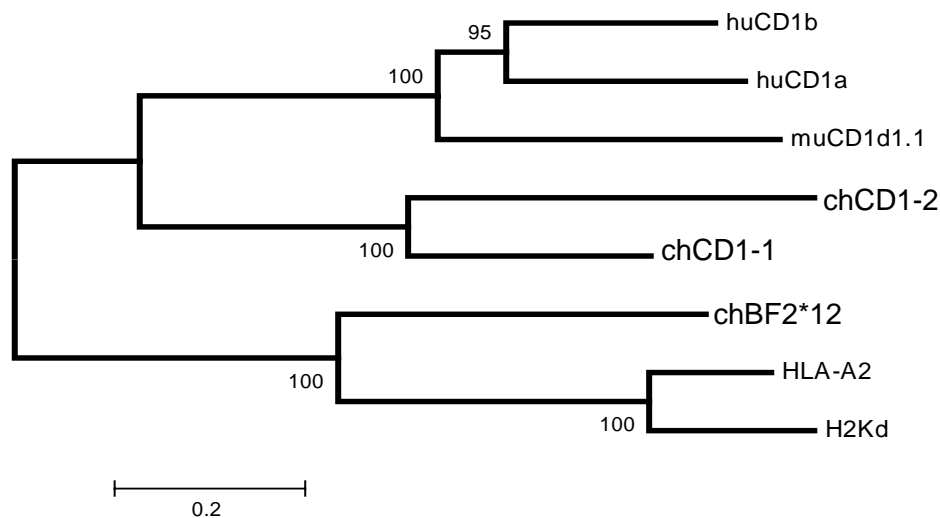

Supplement: pnas_0500105102_2.pdf [file pnas_0500105102_2.pdf]
