# Supplementary material
Source: PubMed Central journal article supplement (PMC1150814)

### A. $\alpha 1$ domains

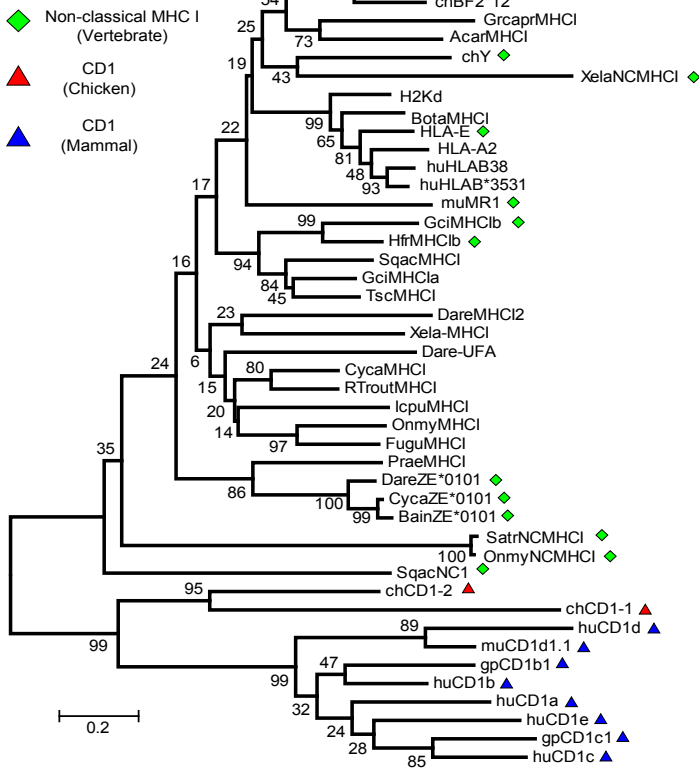

### B. $\alpha 2$ domains

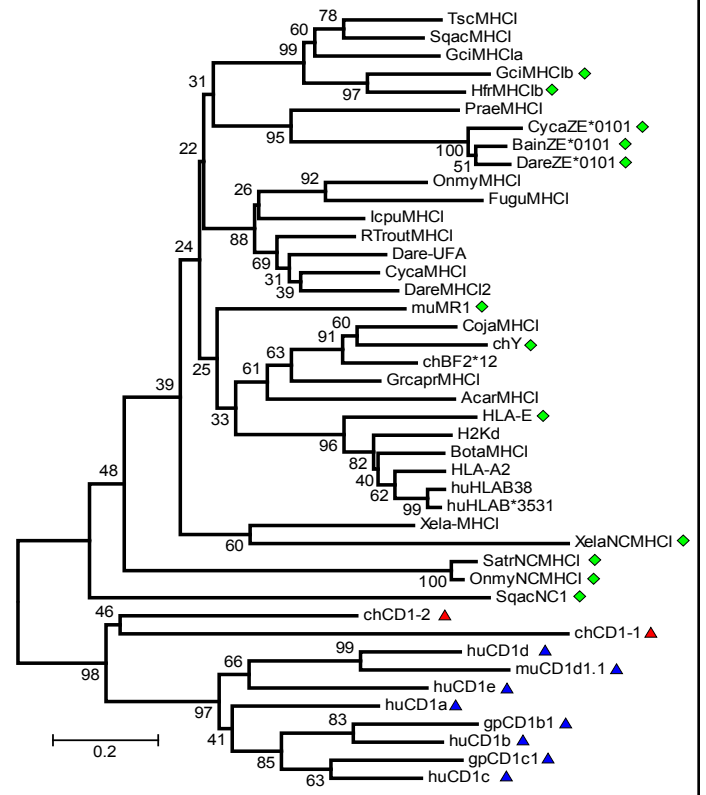

### C. $\alpha 3$ domains

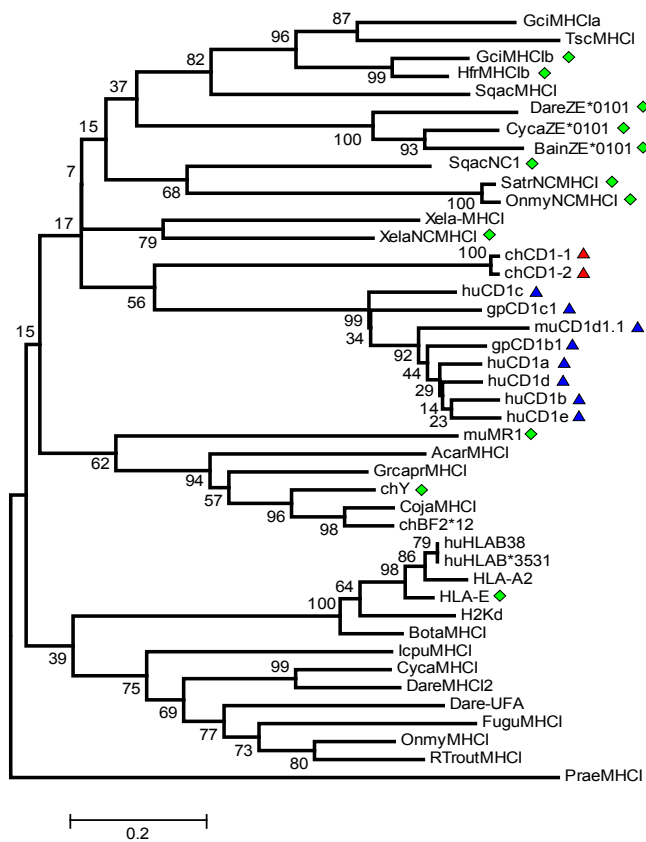

### D. $\alpha 1-2$ domains (antigen binding pocket)

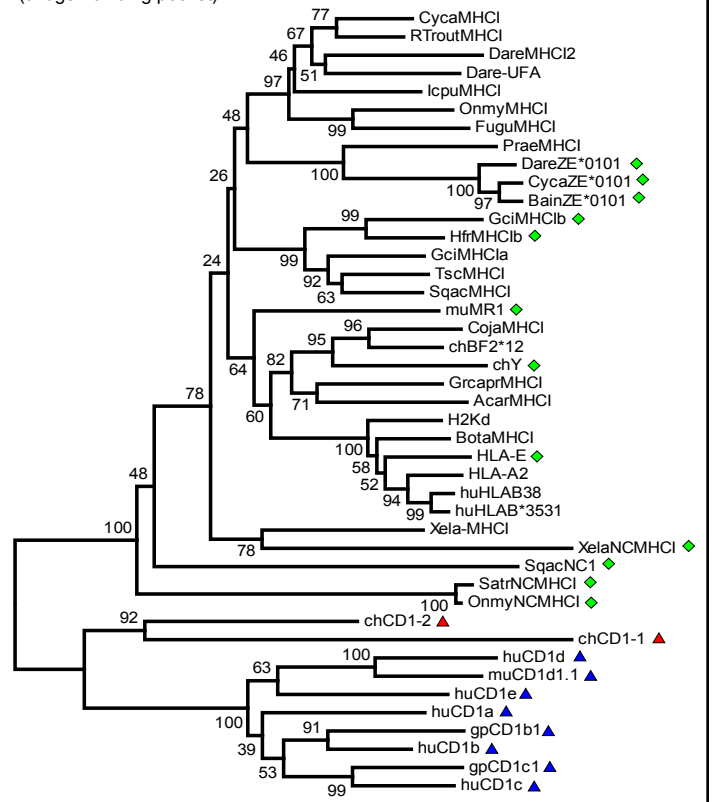

Supplement: pnas_0500105102_3.pdf [file pnas_0500105102_3.pdf]

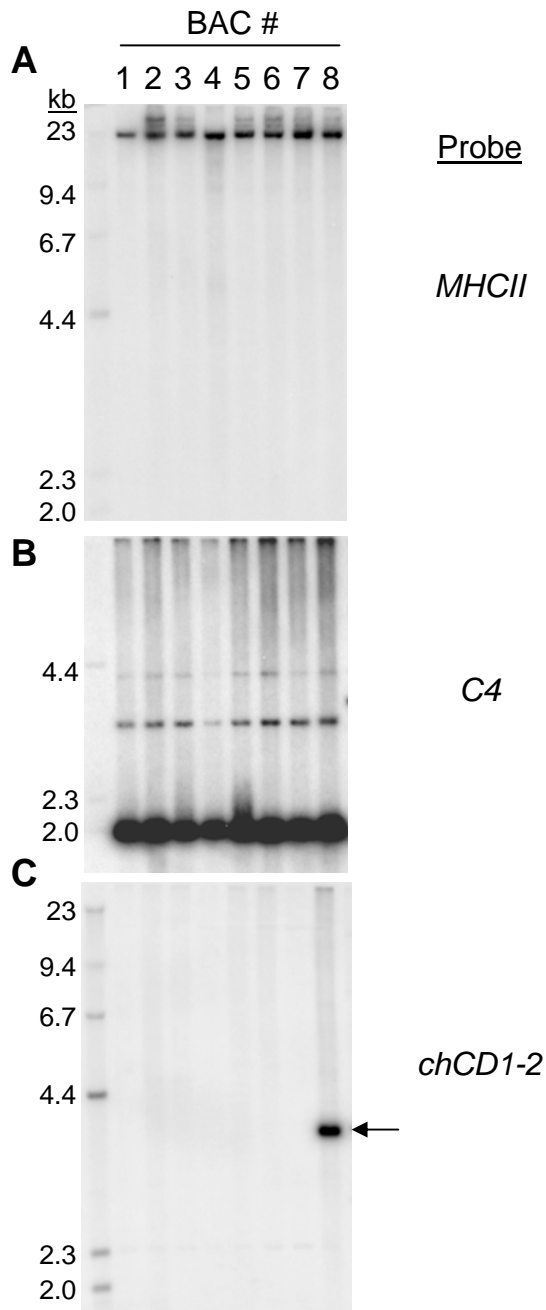

Supplement: pnas_0500105102_4.pdf [file pnas_0500105102_4.pdf]

A

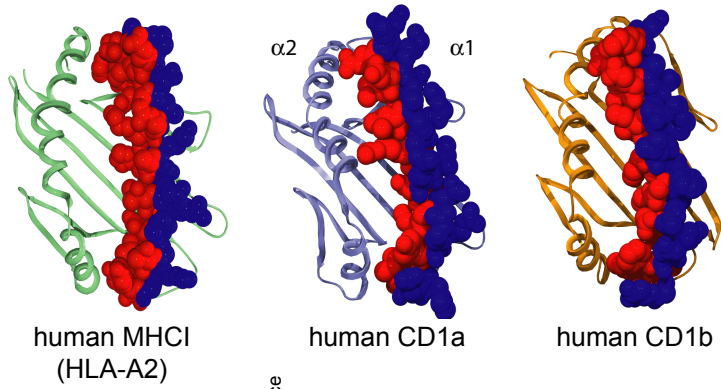

B

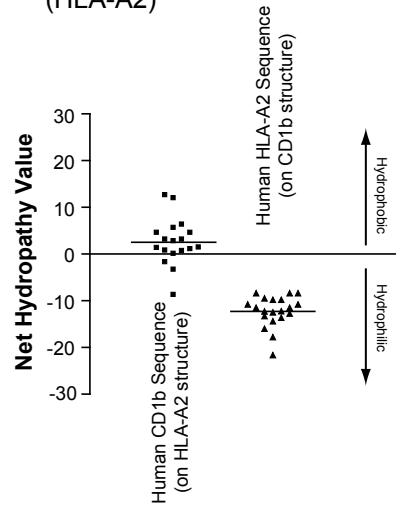

C

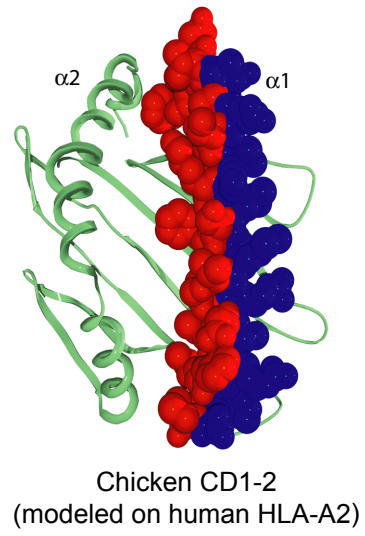

D

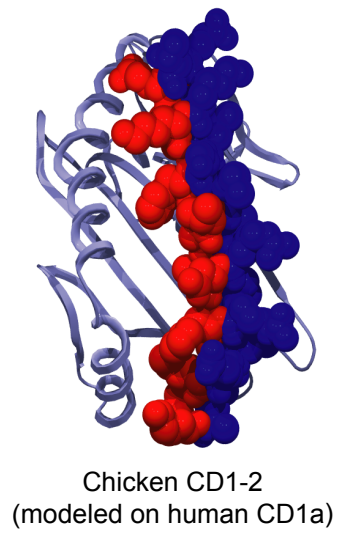

Supplement: pnas_0500105102_5.pdf [file pnas_0500105102_5.pdf]

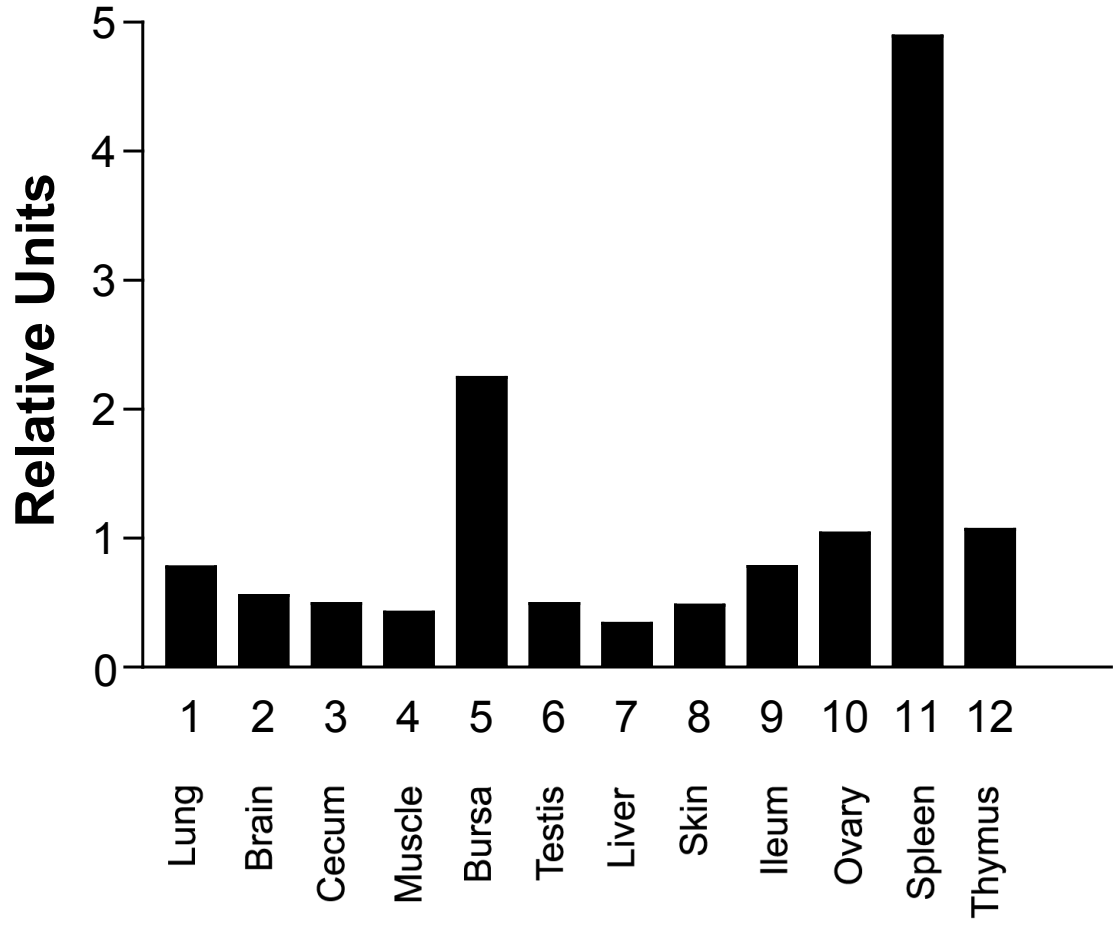

Supplement: pnas_0500105102_6.pdf [file pnas_0500105102_6.pdf]
